# Supplementary material for: Facile microfluidic synthesis of monodispersed size-controllable quantum dot (QD) microbeads using custom developed QD photoresist
Source: Royal Society of Chemistry journal article supplement (doi:10.1039/d3nr03544a), 2023-01-01
Supplement: d3nr03544a1.pdf [file d3nr03544a1.pdf]

## Supplementary Information

### **Facile Microfluidic Synthesis of Monodispersed Size-Controllable Quantum Dot (QD) Microbeads using Custom Developed QD Photoresist†**

Byeongseok Kim,<sup>‡,a</sup> Samir Kumar,<sup>‡,a</sup> Bumsoo Chon,<sup>b</sup> Ho-Jin Son,<sup>b</sup> Sang Ook Kang,<sup>b</sup> and Sungkyu Seo\*,<sup>a</sup>

<sup>a</sup>*Department of Electronics and Information Engineering, Korea University, Sejong 30019, Republic of Korea. E-mail: sseo@korea.ac.kr*

<sup>b</sup>*Department of Advanced Materials Chemistry, Korea University, Sejong 30019, Republic of Korea.*

\*Corresponding author e-mail: sseo@korea.ac.kr (S.S.)

†Electronic supplementary information (ESI) is available. See DOI:

‡These authors contributed equally.

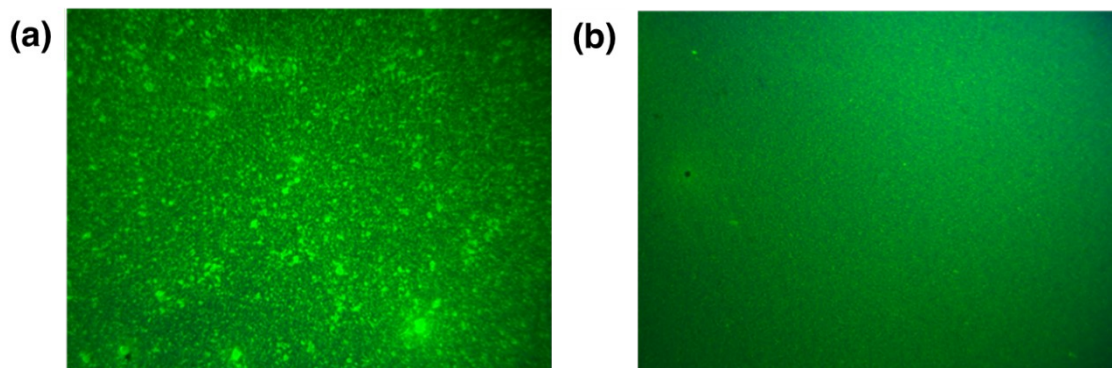

**Fig. S1.** Fluorescence microscopy images of QD in (a) super-coater 1320 and (b) super-coater 1230 thin films.

Fig. S1 shows the 5% QD dispersed in the SC1320 and SC1230 super-coaters. Both SC1320 and SC1230 have a uniform distribution of QDs, with SC1230 having a slightly better distribution of QDs. However, in this study, we used SC1320 because its viscosity was suitable for generating QD-MB using our microfluidic method.
